# Supplementary material for: Predicted mouse peroxisome-targeted proteins and their actual subcellular locations
Source: PubMed Central journal article supplement (PMC2638156; doi:10.1186/1471-2105-9-s12-s16), 2008-12-12
Supplement: 1471-2105-9-S12-S16-S1.pdf [file 1471-2105-9-S12-S16-S1.pdf]

## Additional file 1 – Sequence sources used to construct the PTS2 HMM profile

| Gene           | Species    | Name                                                       | Accession | PTS2 signal |
|----------------|------------|------------------------------------------------------------|-----------|-------------|
| <i>Phyh</i>    | Mouse      | Phytanoyl-CoA hydroxylase [1]                              | AF023463  | RLQVLLGHL   |
| <i>Phyp</i>    | Rat        |                                                            | AF121345  |             |
| <i>PHYH</i>    | Human      |                                                            | BC029512  | RLQIVLGHL   |
| <i>Pex11c</i>  | Mouse      | Peroxisomal biogenesis factor 11c [2]                      | AK007582  | RLLVVSAQF   |
| <i>PEX11G</i>  | Human      | Peroxisomal biogenesis factor 11 gamma [3]                 | BC008780  | RLLVVSTQL   |
| <i>Mvk</i>     | Mouse      | Mevalonate kinase [4-6]                                    | BC005606  | KVILHGEHA   |
| <i>Mvk</i>     | Rat        |                                                            | M29472    |             |
| <i>MVK</i>     | Human      |                                                            | M88468    |             |
| <i>Acaa1b</i>  | Mouse      | Acetyl-Coenzyme A acyltransferase 1B<br>(thiolase B) [7,8] | AY273812  | RLQVVLGHL   |
| <i>Acaa1b</i>  | Rat        |                                                            | J02749    |             |
| <i>Acaal1a</i> | Mouse      | Acetyl-Coenzyme A acyltransferase 1A<br>(thiolase A) [7,8] | AK143187  |             |
| <i>ACAA1</i>   | Human      |                                                            | BC000635  |             |
| <i>Acaal</i>   | Rat        |                                                            | M32801    |             |
| <i>POT1</i>    | Yeast      | 3-ketoacyl-CoA thiolase [9]                                | Z38059    |             |
| <i>Agps</i>    | Mouse      | Alkylglycerone phosphate synthase [10]                     | BC063086  | RLRVLSGHL   |
| <i>Agps</i>    | Rat        |                                                            | AF121052  |             |
| <i>Agps</i>    | Guinea pig |                                                            | Y08826    |             |
| <i>AGPS</i>    | Human      |                                                            | AY544121  |             |

Sequences in column “PTS2 signal” were used to build the HMM profile. References 1-4 and 6-10 support the PTS2-dependent import of proteins into the peroxisomes. Here, *Mvk* was accepted as a PTS2-targeted protein, although reports differ between cytoplasmic [5] and peroxisomal localisation [4, 6] depending on the cell line and methods used.

## References

1. Jansen GA, Ofman R, Denis S, Ferdinandusse S, Hogenhout EM, Jakobs C, Wanders, RJ: **Phytanoyl-CoA hydroxylase from rat liver. Protein purification and cDNA cloning with implications for the subcellular localization of phytanic acid alpha-oxidation.** *J Lipid Res.* 1999, 40: 2244-2254.

2. Li X, Baumgart E, Dong GX, Morrell JC, Jimenez-Sanchez G, Valle D, Smith KD, Gould SJ: **PEX11alpha is required for peroxisome proliferation in response to 4-phenylbutyrate but is dispensable for peroxisome proliferator-activated receptor alpha-mediated peroxisome proliferation.** *Mol Cell Biol* 2002, 22: 8226-8240.
3. Tanaka A, Okumoto K, Fujiki Y: **cDNA cloning and characterization of the third isoform of human peroxin Pex11p.** *Biochem Biophys Res Commun.* 2003, 300: 819-823.
4. Biardi L, Sreedhar A, Zokaei A, Vartak NB, Bozeat RL, Shackelford JE, Keller GA, Krisans SK: **Mevalonate kinase is predominantly localized in peroxisomes and is defective in patients with peroxisome deficiency disorders.** *J Biol Chem.* 1994, 269: 1197-1205.
5. Hogenboom S, Tuyp JJ, Espeel M, Koster J, Wanders RJ, Waterham, HR: **Mevalonate kinase is a cytosolic enzyme in humans.** *J Cell Sci* 2004, 117: 631-639.
6. Kovacs WJ, Tape KN, Shackelford, JE, Duan X, Kasumov T, Kelleher JK, Brunengraber H, Krisans SK: **Localization of the pre-squalene segment of the isoprenoid biosynthetic pathway in mammalian peroxisomes.** *Histochem Cell Biol.* 2007, 127: 273-290.
7. Miyazawa S, Osumi T, Hashimoto T: **The presence of a new 3-oxoacyl-CoA thiolase in rat liver peroxisomes.** *Eur J Biochem.* 1980, 103: 589-596.
8. Swinkels BW, Gould SJ, Bodnar AG, Rachubinski RA, Subramani S: **A novel, cleavable peroxisomal targeting signal at the amino-terminus of the rat 3-ketoacyl-CoA thiolase.** *EMBO J.* 1991, 10: 3255-3262.
9. Glover JR, Andrews DW, Rachubinski RA: **Saccharomyces cerevisiae peroxisomal thiolase is imported as a dimer.** *Proc Natl Acad Sci U S A* 1994, 91: 10541-10545.
10. Biermann J and van den Bosch H: **In vitro processing of the human alkyl-dihydroxyacetonephosphate synthase precursor.** *Arch Biochem Biophys.* 1999, 368: 139-146.
