# Supplementary material for: Predicted mouse peroxisome-targeted proteins and their actual subcellular locations
Source: PubMed Central journal article supplement (PMC2638156; doi:10.1186/1471-2105-9-s12-s16), 2008-12-12

## Additional file 5 – CHO-perRed after two and five passages

DsRed2 expression is not affected by cell passages of CHO-perRed. Left side: Bright field images (original magnification, 200 x). Right side: fluorescent microscopy images of CHO-perRed cells (original magnification, 200 x).

A. Passage 2

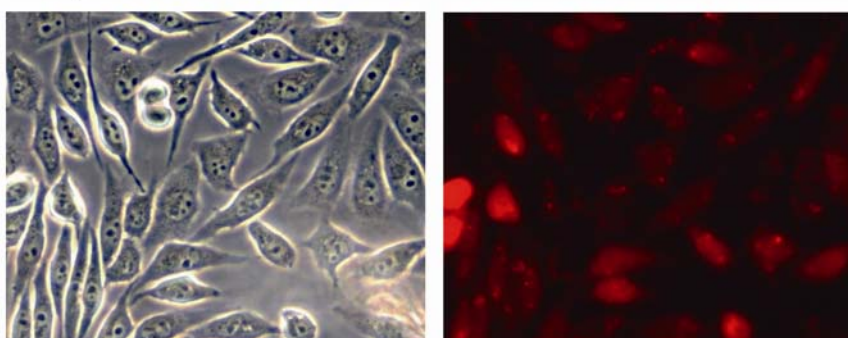

B. Passage 5

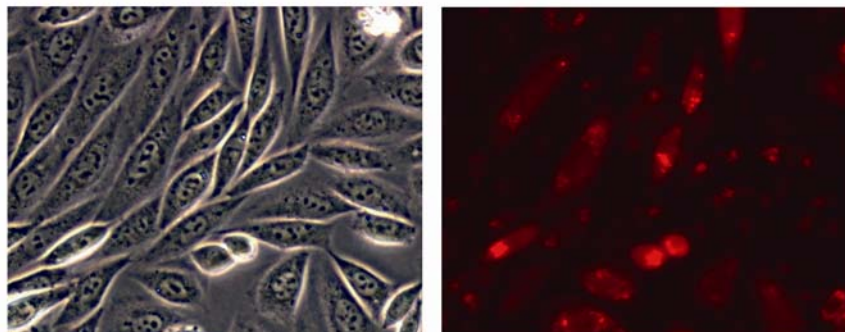

Supplement: 1471-2105-9-S12-S16-S5.pdf [file 1471-2105-9-S12-S16-S5.pdf]
